# Supplementary material for: Potential targeting of FLT3 acute myeloid leukemia
Source: PubMed Central journal article supplement — Haematologica. 2020 Jul 23;106(3):671–81. doi: 10.3324/haematol.2019.240754 (PMC7927884; doi:10.3324/haematol.2019.240754), 2020-07-23
Supplement: 2019_240754-Disclosures_Contributions.pdf [file 2019_240754-Disclosures_Contributions.pdf]

Haematologica  
HAEMATOL/2019/240754  
Version 3  
Potential targeting of FLT3 AML

Alexander J. Ambinder and Mark Levis

Disclosures: Mark Levis: Consulting/honoraria/research funding from Astellas, Fujifilm, Daiichi-Sankyo, Amgen, Agios, Novartis Alexander Ambinder: No disclosures

Contributions: Alexander Ambinder and Mark Levis wrote the manuscript together
